# Supplementary material
Source: Research Square preprint supplement (doi:10.21203/rs.3.rs-14882/v3)
Supplement: Supplementary file 1 [file d0b78cde8f15911c6799e94e.xlsx]

## Sheet: Plan1
	Newton / Kg		Newton
Group	RGM	LGM	RGM	LGM
Control	0.825769	0.579795	553.095	388.343
Control	0.54375	0.52125	426.589	408.937
Control	0.636667	0.636667	374.614	374.614
Control	0.445614	0.442105	249.089	247.128
Control	0.661224	0.557143	317.735	267.722
Control	0.489706	0.526471	326.561	351.078
Control	0.427119	0.423729	247.128	245.166
Control	0.521154	0.553846	265.76	282.432
Control	0.424194	0.472581	257.915	287.335
Control	0.257812	0.294922	129.448	148.08
Control	0.4	0.407463	262.818	267.722
Control	0.367273	0.243636	198.094	131.409
Control	0.35	0.398611	247.128	281.451
Control	0.605	0.595	355.981	350.097
Control	0.652308	0.570769	415.802	363.827
Control	0.404399	0.390863	234.379	226.534
Control	0.400697	0.303136	225.553	170.636
Control	0.774327	0.931677	366.769	441.299
Control	0.595745	0.661702	274.586	304.987
Control	0.647273	0.594545	349.117	320.677
Control	0.333904	0.440068	191.23	252.031
Control	0.293333	0.608889	129.448	268.702
Control	0.432258	0.420968	262.818	255.954
Control	0.654167	0.679167	307.929	319.697
Control	0.734783	0.691304	331.465	311.851
Obese	0.356017	0.463071	420.705	547.211
Obese	0.349383	0.361728	555.056	574.67
Obese	0.118447	0.139806	119.641	141.216
Obese	0.261975	0.220919	262.818	221.63
Obese	0.258007	0.263345	284.393	290.277
Obese	0.231913	0.124876	229.476	123.564
Obese	0.3	0.353659	361.865	426.589
Obese	0.209784	0.173095	218.688	180.442
Obese	0.15128	0.176106	191.23	222.611
Obese	0.254694	0.213878	305.967	256.934
Obese	0.252582	0.210329	263.799	219.669
Obese	0.195506	0.196629	170.636	171.616
Obese	0.155152	0.180606	251.05	292.238
Obese	0.217938	0.215423	254.973	252.031
Obese	0.129804	0.0794193	149.061	91.2018
Obese	0.102759	0.214082	105.912	220.65
Obese	0.253704	0.192593	268.702	203.978
Obese	0.302304	0.275576	321.658	293.219
Obese	0.108974	0.190171	100.028	174.558
Obese	0.384855	0.40249	363.827	380.498
Obese	0.19469	0.183874	194.172	183.384
Obese	0.332447	0.302305	367.749	334.407
Obese	0.174545	0.152727	235.36	205.94
Obese	0.203644	0.308682	186.326	282.432
Obese	0.174652	0.187017	221.63	237.321
